# Supplementary material
Source: PubMed Central journal article supplement (PMC2255019)
Supplement: JCI0832400sd.pdf [file JCI0832400sd.pdf]

# Suppl. Fig. 1

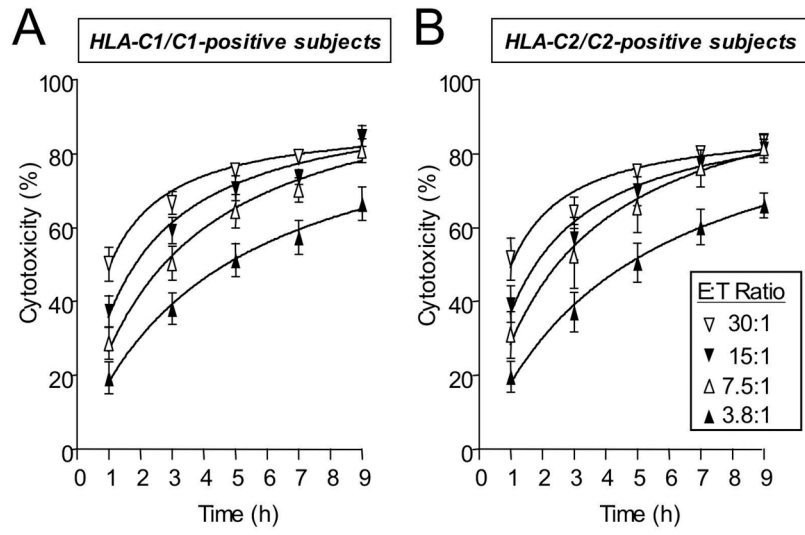

**Suppl. Fig. 1: Bulk NK cells of *HLA-C1* homozygous subjects and of *HLA-C2* homozygous subjects do not differ in the level of cytotoxicity against MHC class I-negative target cells.**

NK cells were isolated from cryopreserved and thawed PBMC of 9 *HLA-C1* homozygous subjects (**A**) and 6 *HLA-C2* homozygous subjects (**B**). Mean and standard error of the mean (SEM) cytotoxicity against K562 cells are indicated.
